# Supplementary figures and images for: Sub-Saharan African Women’s Views and Experiences of Risk Factors for Obstetric Fistula: A Qualitative Systematic Review
Source: Research Square preprint supplement (doi:10.21203/rs.3.rs-611298/v1), 2021-07-12

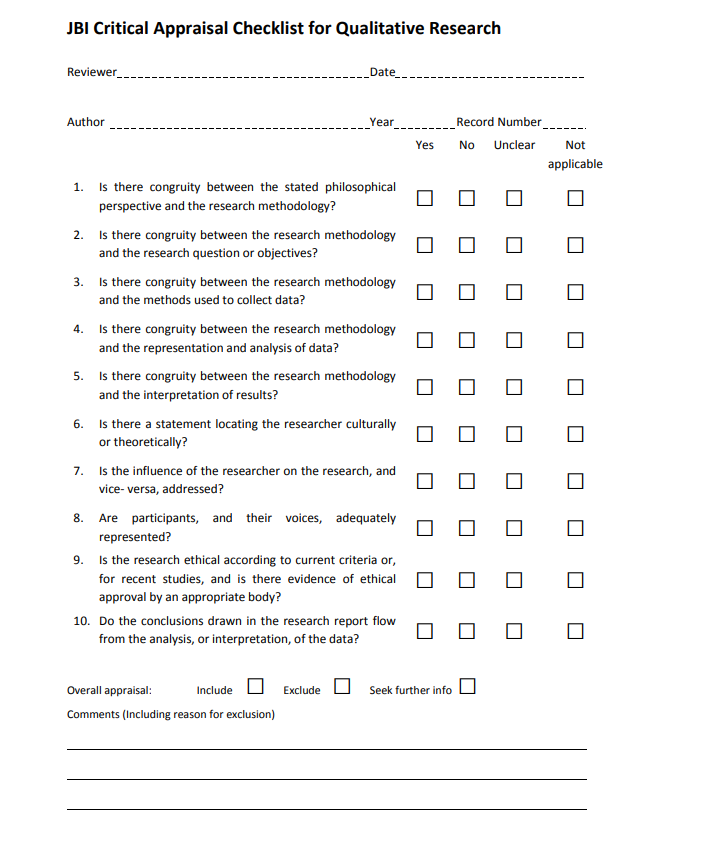

Supplement: Supplementary file 1 [file 1c73f5436cc4ea31b810b167.docx]
